# Supplementary material
Source: publisher figshare collection journal article supplement (https://acs.figshare.com/ndownloader/files/10282881)
Supplement: Supplementary file 1 [file 10282881]

**Supporting information for**  
**Capacity Fading Mechanism of The Commercial 18650 LiFePO<sub>4</sub>-Based Lithium Ion Batteries: An *In-Situ* Time-Resolved High-Energy Synchrotron XRD Study**

**Qi Liu<sup>1,2†</sup>, Yadong Liu<sup>1†</sup>, Fan Yang<sup>1,2</sup>, Hao He<sup>1</sup>, Xianghui Xiao<sup>3</sup>, Yang Ren<sup>3</sup>, Wenquan Lu<sup>4</sup>,  
Eric Stach<sup>5</sup>, and Jian Xie<sup>\*,1</sup>**

<sup>1</sup>Department of Mechanical and Energy Engineering, Purdue School of Engineering and Technology, Indiana University-Purdue University Indianapolis, Indianapolis, IN 46202, USA

<sup>2</sup>School of Mechanical Engineering, Purdue University, West Lafayette, IN, 47907

<sup>3</sup>X-ray Science Division, Advanced Photon Source, Argonne National Laboratory, 9700 South Cass Avenue, Lemont, IL, 60439, USA

<sup>4</sup>Chemical Science and Engineering Division, Argonne National Laboratory, 9700 South Cass Avenue, Lemont, IL, 60439, USA

<sup>5</sup>Department of Materials Science and Engineering, School of Engineering and Applied Science, University of Pennsylvania, 3231 Walnut Street, Philadelphia, PA 19104-6272

<sup>†</sup>These authors contributed equally to this work.

\* Corresponding author: [jianxie@iupui.edu](mailto:jianxie@iupui.edu)

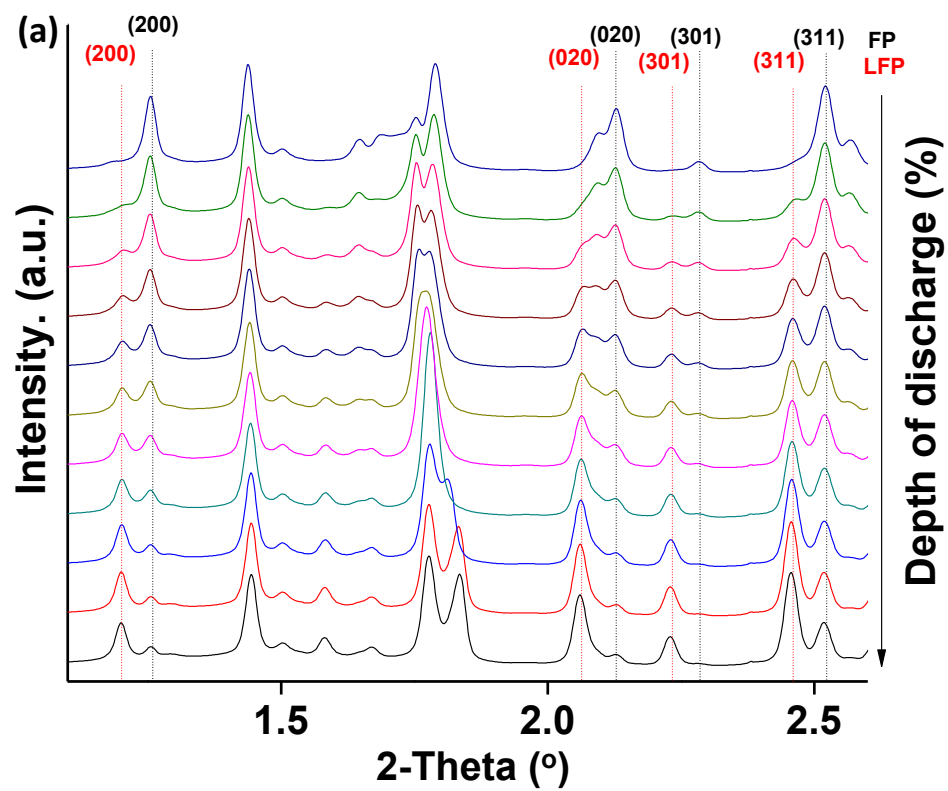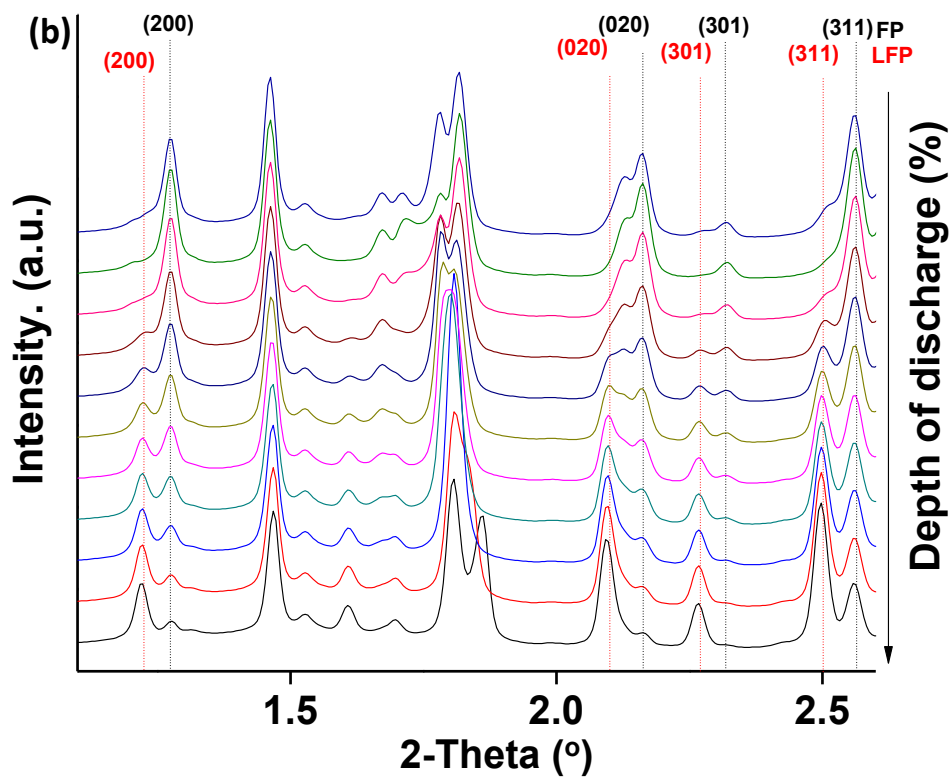

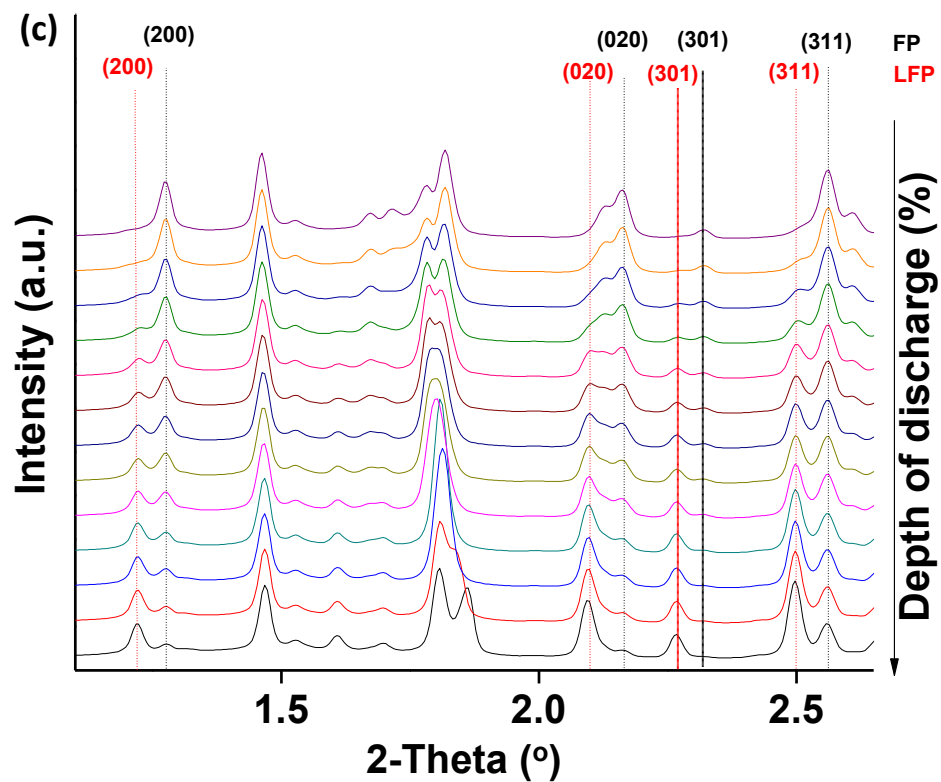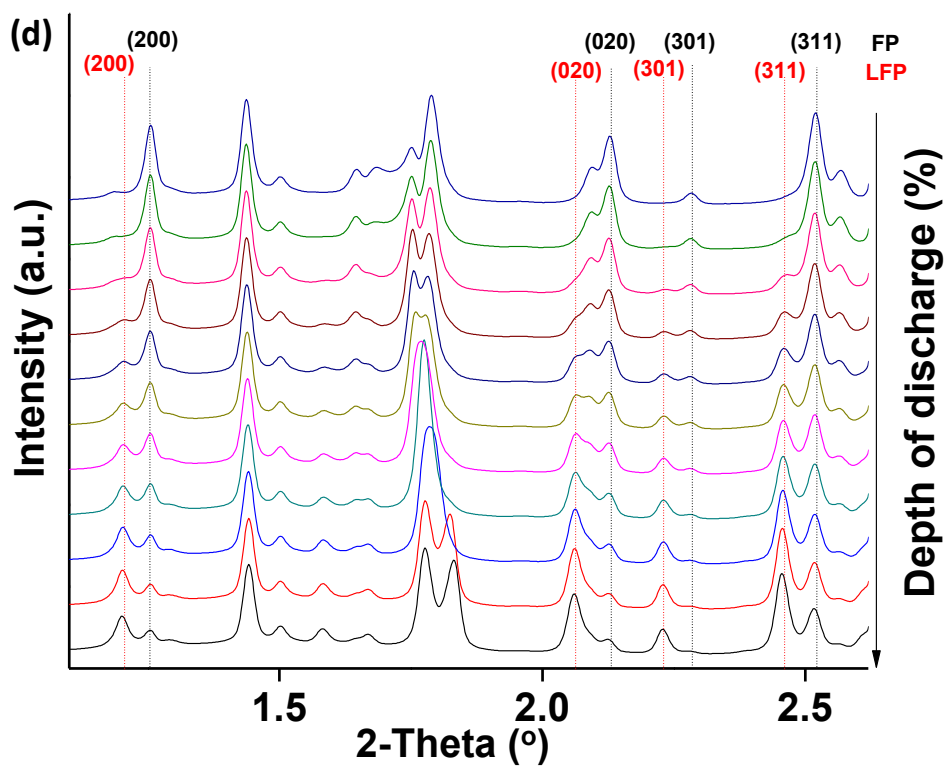

Figure S1 XRD patterns between  $2\theta = 1.0^{\circ}$  and  $2.8^{\circ}$  during discharge process at 1C rate: (a) 500th, (b) 1000th, (c) 1500th, (d) 2000th cycles.

Table S1. Summary of electrochemical impedance spectra fitting results

| Cycle Number | $R_0$    | $C_{SEI}$ | $R_{SEI}$ | $C_{dl}$ | $R_{ct}$ | $\sigma$ |
|--------------|----------|-----------|-----------|----------|----------|----------|
| 1st          | 0.076434 | 0.35731   | 0.002323  | 0.85074  | 0.00406  | 1.982    |
| 2500th       | 0.079489 | 0.47317   | 0.002184  | 0.73111  | 0.004583 | 3.096    |
